# Supplementary material for: Polarization-dependent vibrational shifts on dielectric substrates
Source: Royal Society of Chemistry journal article supplement (doi:10.1039/d0cp02399j), 2020-01-01
Supplement: d0cp02399j1.pdf [file d0cp02399j1.pdf]

## Polarization-Dependent Vibrational Shifts on Dielectric Substrates

C. Yang,<sup>1,2</sup> W. Wang,<sup>2</sup> A. Nefedov,<sup>2</sup> Y. Wang,<sup>2</sup> T. G. Mayerhöfer,<sup>3,4,\*</sup> C. Wöll<sup>2,\*</sup>

<sup>1</sup>Beijing Key Laboratory of Bio-inspired Energy Materials and Devices, School of Space and Environment, Beihang University, Beijing, 100191, China

<sup>2</sup>Institute of Functional Interfaces (IFG), Karlsruhe Institute of Technology (KIT), 76344 Eggenstein-Leopoldshafen, Germany

<sup>3</sup>Leibniz Institute of Photonic Technology (IPHT), Albert-Einstein-Str. 9, D-07745 Jena, Germany

<sup>4</sup>Institute of Physical Chemistry, and Abbe Center of Photonics, Friedrich Schiller University, Jena D-07743, Helmholtzweg 4, Germany

### Combined Matrix formalism for the calculation of reflectance and transmittance of layered anisotropic media

The following combined matrix formalism has been introduced in [1].

The dielectric tensor of a medium is usually specified with regard to an intrinsic coordinate system  $x,y,z$  of a sample. To find the values of  $\boldsymbol{\epsilon}_{x,y,z}$  in a reference frame  $X,Y,Z$  it is necessary to employ an orthogonal transformation according to

$$\boldsymbol{\epsilon}_{X,Y,Z} = \mathbf{A}(\Omega) \cdot \boldsymbol{\epsilon}_{x,y,z} \cdot \mathbf{A}(\Omega)^{-1}, \quad \backslash * \text{MERGEFORMAT (1)}$$

where  $\mathbf{A}(\Omega)$  is a rotation matrix. A convenient way of expressing  $\mathbf{A}(\Omega)$  is e.g. to specify it by one of the 24 possible Euler angle orientation representations.[2] Further possibilities are symmetric Euler angle representations and Quaternions.[2]

In the following we assume a layered system with plane parallel interfaces normal to the  $Z$ -direction of a references frame and a plane wave with wave-vector  $\mathbf{k}_i$  given by  $\mathbf{k}_i = k_0 (0, k_y, k_z)^T$  incident on this system (light wave incident in the  $Y$ - $Z$  plane with an angle of incidence  $\alpha$ ). Employing first-order Maxwell-equations the dependence of the field-vector  $\boldsymbol{\Psi} = (E_x, H_y, E_y, -H_x)^T$  in  $Z$ -direction can be written as

$$\frac{\partial}{\partial Z} \boldsymbol{\Psi} = ik_0 \Delta \boldsymbol{\Psi}, \quad \backslash * \text{MERGEFORMAT (2)}$$

where  $\Delta$  represents a  $4 \times 4$  matrix according to

$$\Delta = \begin{pmatrix} 0 & 1 & 0 & 0 \\ -\sin^2 \alpha + \epsilon_{XX} - \frac{\epsilon_{XZ}^2}{\epsilon_{ZZ}} & 0 & \epsilon_{XY} - \frac{\epsilon_{XZ}\epsilon_{YZ}}{\epsilon_{ZZ}} & -\frac{\epsilon_{XZ} \sin \alpha}{\epsilon_{ZZ}} \\ -\frac{\epsilon_{XZ} \sin \alpha}{\epsilon_{ZZ}} & 0 & -\frac{\epsilon_{YZ} \sin \alpha}{\epsilon_{ZZ}} & 1 - \frac{\sin^2 \alpha}{\epsilon_{ZZ}} \\ \epsilon_{YX} - \frac{\epsilon_{YZ}\epsilon_{XZ}}{\epsilon_{ZZ}} & 0 & \epsilon_{YY} - \frac{\epsilon_{YZ}^2}{\epsilon_{ZZ}} & -\frac{\epsilon_{YZ} \sin \alpha}{\epsilon_{ZZ}} \end{pmatrix}, \quad \backslash * \text{MERGEFORMAT (3)}$$

To obtain the Eigenvalues of the matrix  $\Delta$  the following equation must be solved:

$$\text{Det}(\Delta - \gamma \mathbf{I}) = 0. \quad \backslash * \text{MERGEFORMAT (4)}$$

This yields a quartic equation in  $\gamma$ , called the Booker quartic,

$$\gamma^4 + \alpha_1 \gamma^3 + \alpha_2 \gamma^2 + \alpha_3 \gamma + \alpha_4 = 0. \quad \backslash * \text{MERGEFORMAT (5)}$$

The four solutions of  $\gamma$  are given by,

$$\begin{aligned} \gamma_1 &= -\frac{1}{12} \left( 3\alpha_1 + \sqrt{3K_4} + \sqrt{6(K_5 + K_6)} \right) \\ \gamma_2 &= -\frac{1}{12} \left( 3\alpha_1 + \sqrt{3K_4} - \sqrt{6(K_5 + K_6)} \right) \\ \gamma_3 &= -\frac{1}{12} \left( 3\alpha_1 - \sqrt{3K_4} + \sqrt{6(K_5 - K_6)} \right) \\ \gamma_4 &= -\frac{1}{12} \left( 3\alpha_1 - \sqrt{3K_4} - \sqrt{6(K_5 - K_6)} \right) \end{aligned} \quad \backslash * \text{MERGEFORMAT (6)}$$

with the abbreviations:

$$\begin{aligned} K_1 &= 2\alpha_2^3 - 9\alpha_1\alpha_2\alpha_3 + 27\alpha_3^2 + 27\alpha_1^2\alpha_4 - 72\alpha_2\alpha_4 \\ K_2 &= \alpha_2^2 - 3\alpha_1\alpha_3 + 12\alpha_4 \\ K_3 &= (K_1 + \sqrt{K_1^2 - 4K_2^3})^{1/3} \\ K_4 &= 3\alpha_1^2 - 8\alpha_2 + \frac{4 \times 2^{1/3} K_2}{K_3} + 2 \times 2^{2/3} K_3 \\ K_5 &= 3\alpha_1^2 - 8\alpha_2 - \frac{2 \times 2^{1/3} K_2}{K_3} - 2^{2/3} K_3 \\ K_6 &= \frac{3\sqrt{3} (\alpha_1^3 - 4\alpha_1\alpha_2 + 8\alpha_3)}{\sqrt{K_4}} \end{aligned} \quad \backslash * \text{MERGEFORMAT (7)}$$

Two of the solutions for  $\gamma$  belong to forward traveling waves. For these a positive sign is characteristic if the solutions are real. Otherwise the forward direction is indicated by a positive imaginary part (note that the identification must be repeated separately for each wavelength and each layer!). We denote the two solutions, which belong to forward traveling waves by  $\gamma_{+I}$  and  $\gamma_{+II}$  and the corresponding solutions for backward traveling waves by  $\gamma_{-I}$  and  $\gamma_{-II}$ .

The corresponding Eigenvectors can be determined by putting each  $\gamma_i$  into the homogeneous system of linear equations

$$\begin{pmatrix} \Delta_{11} - \gamma & \Delta_{12} & \Delta_{13} & \Delta_{14} \\ \Delta_{21} & \Delta_{22} - \gamma & \Delta_{23} & \Delta_{24} \\ \Delta_{31} & \Delta_{32} & \Delta_{33} - \gamma & \Delta_{34} \\ \Delta_{41} & \Delta_{42} & \Delta_{43} & \Delta_{44} - \gamma \end{pmatrix} \cdot \begin{pmatrix} \Psi_1 \\ \Psi_2 \\ \Psi_3 \\ \Psi_4 \end{pmatrix} = \mathbf{0}. \quad \backslash * \text{MERGEFORMAT (8)}$$

and by solving simultaneously three of the four equations in eqn. \\* MERGEFORMAT (8). This yields solutions of three components of  $\Psi$  in terms of a fourth, which is arbitrary.

The following two solutions for the eigenvectors have been obtained based on Cramer's rule, where the subscripts indicate the choice of the equations from eqn. (15).

$$\Psi_{1,2,3,i} = \begin{pmatrix} \text{Det} \begin{vmatrix} \Delta_{14} & \Delta_{12} & \Delta_{13} \\ \Delta_{24} & \Delta_{22}-\gamma_i & \Delta_{23} \\ \Delta_{34} & \Delta_{32} & \Delta_{33}-\gamma_i \end{vmatrix} \\ \text{Det} \begin{vmatrix} \Delta_{11}-\gamma_i & \Delta_{14} & \Delta_{13} \\ \Delta_{21} & \Delta_{24} & \Delta_{23} \\ \Delta_{31} & \Delta_{34} & \Delta_{33}-\gamma_i \end{vmatrix} \\ \text{Det} \begin{vmatrix} \Delta_{11}-\gamma_i & \Delta_{12} & \Delta_{14} \\ \Delta_{21} & \Delta_{22}-\gamma_i & \Delta_{24} \\ \Delta_{31} & \Delta_{32} & \Delta_{34} \end{vmatrix} \\ \text{Det} \begin{vmatrix} \Delta_{11}-\gamma_i & \Delta_{12} & \Delta_{13} \\ \Delta_{21} & \Delta_{22}-\gamma_i & \Delta_{23} \\ \Delta_{31} & \Delta_{32} & \Delta_{33}-\gamma_i \end{vmatrix} \end{pmatrix}, \Psi_{2,3,4,i} = \begin{pmatrix} \begin{vmatrix} \Delta_{24} & \Delta_{22}-\gamma_i & \Delta_{23} \\ \Delta_{34} & \Delta_{32} & \Delta_{33}-\gamma_i \\ \Delta_{44}-\gamma_i & \Delta_{42} & \Delta_{43} \end{vmatrix} \\ \begin{vmatrix} \Delta_{21} & \Delta_{24} & \Delta_{23} \\ \Delta_{31} & \Delta_{34} & \Delta_{33}-\gamma_i \\ \Delta_{41} & \Delta_{44}-\gamma_i & \Delta_{43} \end{vmatrix} \\ \begin{vmatrix} \Delta_{21} & \Delta_{22}-\gamma_i & \Delta_{24} \\ \Delta_{31} & \Delta_{32} & \Delta_{34} \\ \Delta_{41} & \Delta_{42} & \Delta_{44}-\gamma_i \end{vmatrix} \\ \begin{vmatrix} \Delta_{21} & \Delta_{22}-\gamma_i & \Delta_{23} \\ \Delta_{31} & \Delta_{32} & \Delta_{33}-\gamma_i \\ \Delta_{41} & \Delta_{42} & \Delta_{43} \end{vmatrix} \end{pmatrix} \cdot \backslash * \text{MERGEFORMAT}$$

(9)

From the eigenvectors obtained from eqn. \\* MERGEFORMAT (9), new vectors  $\Psi_i$  can be formed by linear combination,

$$\Psi_i = \Psi_{1,2,3,i} + \Psi_{2,3,4,i}, \quad i = +I, -I, +II, -II, \quad \backslash * \text{MERGEFORMAT (10)}$$

and a matrix  $\mathbf{D}_\Psi$  can be determined, according to

$$\mathbf{D}_\Psi = \begin{pmatrix} \Psi_{+I,1} & \Psi_{-I,1} & \Psi_{+II,1} & \Psi_{-II,1} \\ \Psi_{+I,2} & \Psi_{-I,2} & \Psi_{+II,2} & \Psi_{-II,2} \\ \Psi_{+I,3} & \Psi_{-I,3} & \Psi_{+II,3} & \Psi_{-II,3} \\ \Psi_{+I,4} & \Psi_{-I,4} & \Psi_{+II,4} & \Psi_{-II,4} \end{pmatrix}. \quad \backslash * \text{MERGEFORMAT (11)}$$

This matrix is called the dynamical matrix. Since backward traveling waves do not exist in the semiinfinite medium  $N+1$ ,

$\mathbf{D}_\Psi(N+1)$  simplifies to

$$\mathbf{D}_\Psi(N+1) = \begin{pmatrix} \Psi_{+I,1} & 0 & \Psi_{+II,1} & 0 \\ \Psi_{+I,2} & 0 & \Psi_{+II,2} & 0 \\ \Psi_{+I,3} & 0 & \Psi_{+II,3} & 0 \\ \Psi_{+I,4} & 0 & \Psi_{+II,4} & 0 \end{pmatrix}. \quad \backslash * \text{MERGEFORMAT (12)}$$

The four amplitudes  $A_i$  of the waves within a layered medium  $n$  are linked with the amplitudes  $A_i(n-1)$  of the medium  $n-1$  at the boundary between medium  $n$  and  $n-1$  by

$$\begin{pmatrix} A_1(n-1) \\ A_2(n-1) \\ A_3(n-1) \\ A_4(n-1) \end{pmatrix} = \mathbf{D}_\Psi^{-1}(n-1) \mathbf{D}_\Psi(n) \mathbf{P}(n) \begin{pmatrix} A_1(n) \\ A_2(n) \\ A_3(n) \\ A_4(n) \end{pmatrix}. \quad \backslash * \text{MERGEFORMAT (13)}$$

The diagonal matrices  $\mathbf{P}(n)$  are usually called propagation matrices and are given by

$$\mathbf{P}(n) = \begin{pmatrix} \exp(ik_0 d_n \gamma_{+1}) & 0 & 0 & 0 \\ 0 & \exp(ik_0 d_n \gamma_{-1}) & 0 & 0 \\ 0 & 0 & \exp(ik_0 d_n \gamma_{+II}) & 0 \\ 0 & 0 & 0 & \exp(ik_0 d_n \gamma_{-II}) \end{pmatrix}, \backslash * \text{MERGEFORMAT (14)}$$

where  $d_n$  represents the layer thickness. By introducing the transfer matrix  $\mathbf{T}_p$ , the amplitudes of the incident waves and the reflected waves at the interface medium 0 / medium 1 can be linked with the amplitudes of the transmitted waves in the exit medium ( $N+1$ ) by the equation

$$\begin{pmatrix} A_s \\ B_s \\ A_p \\ B_p \end{pmatrix} = \mathbf{D}_\Psi^{-1}(0) \prod_{n=1}^N \mathbf{T}_p(n) \mathbf{D}_\Psi(N+1) \begin{pmatrix} C_s \\ 0 \\ C_p \\ 0 \end{pmatrix}. \quad \backslash * \text{MERGEFORMAT (15)}$$

Here, the transfer matrix of the  $n$ th layer can be calculated by  $\mathbf{T}_p(n) = \mathbf{D}_\Psi(n) \mathbf{P}(n) \mathbf{D}_\Psi^{-1}(n)$  and the transfer matrices in the product are ordered according to their  $Z$ -coordinates.  $A_s$  and  $A_p$  represent the amplitudes of the incident waves with  $s$ - and  $p$ -polarization, and the  $B_i$  and  $C_i$  are the amplitudes of the reflected and the transmitted waves, respectively.

Finally, we define a matrix  $\mathcal{M}^0$  by the relation

$$\mathcal{M}^0 = \mathbf{D}_\Psi^{-1}(0) \prod_{n=1}^N \mathbf{T}_p(n) \mathbf{D}_\Psi(N+1). \quad \backslash * \text{MERGEFORMAT (16)}$$

$$\begin{pmatrix} A_s \\ B_s \\ A_p \\ B_p \end{pmatrix} = \begin{pmatrix} \mathcal{M}_{11}^0 & \mathcal{M}_{12}^0 & \mathcal{M}_{13}^0 & \mathcal{M}_{14}^0 \\ \mathcal{M}_{21}^0 & \mathcal{M}_{22}^0 & \mathcal{M}_{23}^0 & \mathcal{M}_{24}^0 \\ \mathcal{M}_{31}^0 & \mathcal{M}_{32}^0 & \mathcal{M}_{33}^0 & \mathcal{M}_{34}^0 \\ \mathcal{M}_{41}^0 & \mathcal{M}_{42}^0 & \mathcal{M}_{43}^0 & \mathcal{M}_{44}^0 \end{pmatrix} \begin{pmatrix} C_s \\ 0 \\ C_p \\ 0 \end{pmatrix}. \quad \backslash * \text{MERGEFORMAT (17)}$$

The reflection and transmission coefficients  $r_{ss}$  and  $t_{ps}$ , e.g., can then be calculated as follows:

$$r_{ss} = \left( \frac{B_s}{A_s} \right)_{A_p=0} = \frac{\mathcal{M}_{21}^0 \mathcal{M}_{33}^0 - \mathcal{M}_{23}^0 \mathcal{M}_{31}^0}{\mathcal{M}_{11}^0 \mathcal{M}_{33}^0 - \mathcal{M}_{13}^0 \mathcal{M}_{31}^0}, \quad \backslash * \text{MERGEFORMAT (18)}$$

$$t_{ps} = \left( \frac{C_s}{A_p} \right)_{A_s=0} = \frac{-\mathcal{M}_{13}^0}{\mathcal{M}_{11}^0 \mathcal{M}_{33}^0 - \mathcal{M}_{13}^0 \mathcal{M}_{31}^0}.$$

The first subscript of the coefficients denotes the polarization of the incident wave and the second the orientation of the analyzer, respectively. The corresponding reflectances  $R_{ij}$ , where  $ij = s,p$ , are obtained by:

$$R_{ij} = |r_{ij}|^2. \quad \backslash * \text{MERGEFORMAT (19)}$$

For the system vacuum/C=O layer/substrate, the dynamical matrices of the scalar media are:

$$\mathbf{D}(\text{vacuum}) = \begin{pmatrix} 1 & 1 & 0 & 0 \\ \cos \alpha & \cos \alpha & 0 & 0 \\ 0 & 0 & \cos \alpha & \cos \alpha \\ 0 & 0 & -1 & 1 \end{pmatrix}. \quad \backslash * \text{ MERGEFORMAT (20)}$$

$$\mathbf{D}(\text{Subs}) = \begin{pmatrix} 1 & 0 & 0 & 0 \\ n_{\text{Subs}} \cos \beta_{\text{Subs}} & 0 & 0 & 0 \\ 0 & 0 & \cos \beta_{\text{Subs}} & 0 \\ 0 & 0 & -n_{\text{Subs}} & 0 \end{pmatrix}. \quad \backslash * \text{ MERGEFORMAT (21)}$$

Where  $\cos \beta_{\text{Subs}}$  is obtained by using Snell's law:

$$\cos \beta_{\text{Subs}} = \sqrt{1 - \left[ (1/n_{\text{Subs}}) \sin \alpha \right]^2}. \quad \backslash * \text{ MERGEFORMAT (22)}$$

As long as the layered medium is uniaxial and oriented with its unique axis along Z, the delta matrix of this medium is given by:

$$\Delta = \begin{pmatrix} 0 & 1 & 0 & 0 \\ -\sin^2 \alpha + \varepsilon_{XX} & 0 & 0 & 0 \\ 0 & 0 & 0 & 1 - \frac{\sin^2 \alpha}{\varepsilon_{ZZ}} \\ 0 & 0 & \varepsilon_{YY} & 0 \end{pmatrix}, \quad \backslash * \text{ MERGEFORMAT (23)}$$

The corresponding dynamical matrix is then determined as:

$$\mathbf{D}(\text{Subs}) = \begin{pmatrix} 1 & 1 & 0 & 0 \\ \frac{1}{\sqrt{\sin^2 \alpha + \varepsilon_{XX}}} & -\frac{1}{\sqrt{\sin^2 \alpha + \varepsilon_{XX}}} & 0 & 0 \\ 1 & 1 & 0 & 0 \\ 0 & 0 & -\sqrt{\frac{1 - \sin^2 \alpha}{\varepsilon_{ZZ}}} & \sqrt{\frac{1 - \sin^2 \alpha}{\varepsilon_{ZZ}}} \\ 0 & 0 & 1 & 1 \end{pmatrix}. \quad \backslash * \text{ MERGEFORMAT (24)}$$

In this case, the 4×4 matrices can be separated into two 2×2 matrices and further simplifications are possible. The reflection coefficient for s- and p-polarized light are then given by:[3]

$$\begin{aligned} r_s &= \frac{r_{12,s} + r_{23,s} \exp(2i\phi)}{1 + r_{12,s} r_{23,s} \exp(2i\phi)} \\ r_{12,s} &= \frac{k'_1 - k'_2}{k'_1 + k'_2}, r_{23,s} = \frac{k'_2 - k'_3}{k'_2 + k'_3} \\ k'_1 &= \cos \alpha \\ k'_i(\nu) &= n'_i(\nu) \cos \beta_i = \sqrt{n'_i(\nu)^2 - \sin^2 \alpha} \quad i = 2, 3 \\ n'_2(\nu) &= \sqrt{\varepsilon_{XX}} \\ \phi(\nu) &= 2\pi n'_2(\nu) d \end{aligned} \quad \backslash * \text{ MERGEFORMAT (25)}$$

$$\begin{aligned}
r_p &= \frac{r_{12,p} + r_{23,p} \exp(2i\phi)}{1 + r_{12,p} r_{23,p} \exp(2i\phi)} \\
r_{12,p} &= \frac{n_1^2 k_2' - \sqrt{\varepsilon_{YY} \varepsilon_{ZZ}} k_1'}{n_1^2 k_2' + \sqrt{\varepsilon_{YY} \varepsilon_{ZZ}} k_1'}, r_{23,p} = \frac{\sqrt{\varepsilon_{YY} \varepsilon_{ZZ}} k_3' - n_3^2 k_2'}{\sqrt{\varepsilon_{YY} \varepsilon_{ZZ}} k_3' + n_3^2 k_2'} \\
k_1' &= n_1' \cos \alpha \\
k_i'(\vartheta) &= n_i'(\vartheta) \cos \beta_i = \sqrt{n_i'^2(\vartheta) - \sin^2 \alpha} \quad i = 2, 3 \\
n_2'(\vartheta) &= \sqrt{\varepsilon_{ZZ}} \\
\phi(\vartheta) &= 2\pi \vartheta \frac{\sqrt{\varepsilon_{YY}}}{\sqrt{\varepsilon_{ZZ}}} k_2'(\vartheta) d
\end{aligned}$$

.\* MERGEFORMAT (26)

If we set  $\varepsilon_{ZZ} = \varepsilon_{b,\parallel}$  and  $\varepsilon_{YY} = \varepsilon_{b,\perp}$ , eqn. (0.1) is obtained.

#### References:

- [1] T. G. Mayerhöfer and J. Popp, Journal of Optics A: Pure and Applied Optics **8**, 657 (2006).
- [2] T. G. Mayerhofer, Spectrochimica acta. Part A, Molecular and biomolecular spectroscopy **61**, 2611 (2005).
- [3] O. E. Piro, Physical Review B **36**, 3427 (1987).
